# Supplementary material for: Transcriptome Dynamics during Black and White Sesame (Sesamum indicum L.) Seed Development and Identification of Candidate Genes Associated with Black Pigmentation
Source: MDPI journal article supplement (doi:10.3390/genes11121399), 2020-11-25
Supplement: s1 [file s1]

### Additional file 3

**Table S3:** Summary of the transcriptome of black sesame at different stages

| DPA                                     | 5 DPA    | 8 DPA    | 11 DPA  | 14 DPA   | 17 DPA  | 20 DPA  | 23 DPA   | 26 DPA    | 30 DPA  |
|-----------------------------------------|----------|----------|---------|----------|---------|---------|----------|-----------|---------|
| Obtained Clean Pair-end Reads (million) | 82.54831 | 98.69437 | 91.1944 | 78.81151 | 89.1253 | 97.992  | 90.52644 | 78.857902 | 79.5351 |
| Obtained Clean Bases (Mbp)              | 10401.09 | 12435.49 | 11490.5 | 9930.251 | 11229.8 | 12347   | 11406.33 | 9936.0957 | 10021.4 |
| Mapped Reads (million)                  | 70.13013 | 87.31255 | 77.499  | 66.51305 | 75.0768 | 82.1375 | 76.8366  | 66.735251 | 67.5291 |
| Mapped Reads(%)                         | 84.785   | 88.465   | 84.96   | 84.395   | 84.185  | 83.82   | 85.045   | 84.805    | 84.97   |
| Unique Mapped Reads (million)           | 66.72167 | 83.81085 | 73.8241 | 64.82752 | 72.0286 | 78.3307 | 74.32997 | 65.257813 | 65.7833 |
| Unique Mapped Reads(%)                  | 80.465   | 84.935   | 80.85   | 82.255   | 80.795  | 79.945  | 82.245   | 82.98     | 82.78   |

**Table S4:** Summary of the transcriptome of white sesame at different stages

| DPA                                     | 5 DPA    | 8 DPA    | 11 DPA  | 14 DPA   | 17 DPA  | 20 DPA  | 23 DPA   | 26 DPA    | 30 DPA  |
|-----------------------------------------|----------|----------|---------|----------|---------|---------|----------|-----------|---------|
| Obtained Clean Pair-end Reads (million) | 90.39882 | 118.4011 | 111.655 | 83.84413 | 123.589 | 90.2825 | 102.4909 | 89.889964 | 86.5798 |
| Obtained Clean Bases (Mbp)              | 11390.25 | 14064.96 | 14068.5 | 10564.36 | 16425.8 | 11375.6 | 12913.85 | 11326.135 | 10909.1 |
| Mapped Reads (million)                  | 78.00359 | 102.3412 | 95.9727 | 71.93774 | 104.942 | 77.2522 | 86.77828 | 75.435828 | 72.2751 |
| Mapped Reads(%)                         | 86.275   | 86.4     | 85.96   | 85.77    | 84.93   | 85.585  | 84.66    | 83.885    | 83.47   |
| Unique Mapped Reads (million)           | 74.59041 | 96.28342 | 91.026  | 69.03757 | 99.1779 | 73.4462 | 84.72037 | 72.438361 | 70.3773 |
| Unique Mapped Reads(%)                  | 82.54    | 81.49    | 81.515  | 82.355   | 80.335  | 81.335  | 82.67    | 80.68     | 81.28   |

**Table S5:** Information on the 20 candidate genes

| Chr_V2       | Gene ID     | NCBI annotation-blast                                                      | swissprot                                                                                                      | trembl                                                                                      | IPR                                                                                                                |
|--------------|-------------|----------------------------------------------------------------------------|----------------------------------------------------------------------------------------------------------------|---------------------------------------------------------------------------------------------|--------------------------------------------------------------------------------------------------------------------|
| <b>chr7</b>  | SIN_1001138 | crocetin glucosyltransferase, chloroplastic-like [Sesamum indicum]         | U75C1_ARATH UDP-glycosyltransferase 75C1 OS=Arabidopsis thaliana GN=UGT75C1 PE=2 SV=2                          | Q8RU71_TOBAC Glucosyltransferase OS=Nicotiana tabacum GN=NtGT2 PE=2 SV=1                    | IPR002213; UDP-glucuronosyl/UDP-glucosyltransferase                                                                |
| <b>chr2</b>  | SIN_1002392 | probable carotenoid cleavage dioxygenase 4, chloroplastic[Sesamum indicum] | CCD4_ARATH Probable carotenoid cleavage dioxygenase 4, chloroplastic OS=Arabidopsis thaliana GN=CCD4 PE=1 SV=1 | Q2PHF8_LACSA Carotenoid cleavage dioxygenase 1 OS=Lactuca sativa GN=LsCCD1 PE=2 SV=1        | IPR004294; Carotenoid oxygenase                                                                                    |
| <b>chr8</b>  | SIN_1006025 | isochorismate synthase, chloroplastic [Sesamum indicum]                    | ICS_CATRO Isochorismate synthase, chloroplastic OS=Catharanthus roseus PE=1 SV=1                               | B9R951_RICCO Isochorismate synthase, putative OS=Ricinus communis GN=RCOM_1513750 PE=4 SV=1 | IPR015890; Chorismate binding, C-terminal                                                                          |
| <b>chr4</b>  | SIN_1006242 | cytochrome P450 93A3-like [Sesamum indicum]                                | C93A1_SOYBN Cytochrome P450 93A1 OS=Glycine max GN=CYP93A1 PE=2 SV=1                                           | B9II24_POPTR Cytochrome P450 OS=Populus trichocarpa GN=CYP93A4 PE=3 SV=1                    | IPR001128; Cytochrome P450 IPR002401; Cytochrome P450, E-class, group I IPR017972; Cytochrome P450, conserved site |
| <b>chr12</b> | SIN_1006892 | uncharacterized protein LOC105175232 [Sesamum indicum]                     | NA                                                                                                             | C6T3E9_SOYBN Putative uncharacterized protein OS=Glycine max PE=2 SV=1                      | IPR006041; Pollen Ole e 1 allergen/extensin                                                                        |
| <b>chr1</b>  | SIN_1013986 | ferruginol synthase-like [Sesamum indicum]                                 | C76C1_ARATH Cytochrome P450 76C1 OS=Arabidopsis thaliana GN=CYP76C1 PE=2 SV=1                                  | Q2PF19_VERHY Cytochrome P450 OS=Verbena hybrida PE=2 SV=1                                   | IPR001128; Cytochrome P450 IPR002401; Cytochrome P450, E-class, group I IPR017972; Cytochrome P450, conserved site |

|              |             |                                                            |                                                                                  |                                                                                                                                              |                                                                                                                                                        |
|--------------|-------------|------------------------------------------------------------|----------------------------------------------------------------------------------|----------------------------------------------------------------------------------------------------------------------------------------------|--------------------------------------------------------------------------------------------------------------------------------------------------------|
| <b>chr4</b>  | SIN_1016759 | polyphenol oxidase I, chloroplastic-like [Sesamum indicum] | PPO_MALDO<br>Polyphenol oxidase, chloroplastic OS=Malus domestica PE=2 SV=1      | B9VS06_9ERIC<br>Polyphenoloxidase OS=Camellia nitidissima PE=2 SV=1                                                                          | IPR002227; Tyrosinase IPR022739; Polyphenol oxidase, central domain IPR022740; Polyphenol oxidase, C-terminal                                          |
| <b>chr6</b>  | SIN_1018543 | transcription factor WER-like [Sesamum indicum]            | MYB1_MAIZE Myb-related protein Zm1 OS=Zea mays PE=2 SV=1                         | Q7Y0W6_PERFR MYBC05 OS=Perilla frutescens var. crispa GN=mybc05 PE=2 SV=1                                                                    | IPR001005; SANT domain, DNA binding IPR014778; Myb, DNA-binding IPR017877; MYB-like IPR017930; Transcription regulator HTH, Myb-type, DNA-binding      |
| <b>chr10</b> | SIN_1018917 | cytochrome P450 71A1-like [Sesamum indicum]                | C83B1_ARATH<br>Cytochrome P450 83B1 OS=Arabidopsis thaliana GN=CYP83B1 PE=1 SV=1 | E0CPK7_VITVI Whole genome shotgun sequence of line PN40024, scaffold_1.assembly12x (Fragment) OS=Vitis vinifera GN=VIT_00009854001 PE=4 SV=1 | IPR001128; Cytochrome P450 IPR002401; Cytochrome P450, E-class, group I IPR017972; Cytochrome P450, conserved site                                     |
| <b>chr10</b> | SIN_1018959 | chalcone synthase-like [Sesamum indicum]                   | CHSY_PERFR Chalcone synthase OS=Perilla frutescens GN=CHS PE=2 SV=1              | A5A369_SOLSC Chalcone synthase OS=Solenostemon scutellarioides PE=2 SV=1                                                                     | IPR001099; Chalcone/stilbene synthase, N-terminal IPR012328; Chalcone/stilbene synthase, C-terminal                                                    |
| <b>chr10</b> | SIN_1018961 | chalcone synthase [Sesamum indicum]                        | CHSY_ANTMA<br>Chalcone synthase OS=Antirrhinum majus GN=CHS PE=3 SV=1            | Q2WBN0_9LAMI Chalcone synthase OS=Misopates orontium GN=chs PE=2 SV=1                                                                        | IPR001099; Chalcone/stilbene synthase, N-terminal IPR012328; Chalcone/stilbene synthase, C-terminal IPR018088; Chalcone/stilbene synthase, active site |
| <b>chr6</b>  | SIN_1020696 | cytochrome P450 71D95-like [Sesamum indicum]               | C71DF_MENPI<br>Cytochrome P450 71D15 OS=Mentha piperita GN=CYP71D15 PE=1 SV=1    | D2KC84_SCODU<br>Cytochrome P450 CYP71D177 OS=Scoparia dulcis GN=CYP6 PE=2 SV=1                                                               | IPR001128; Cytochrome P450 IPR002401; Cytochrome P450, E-class, group I IPR017972; Cytochrome P450, conserved site                                     |

|              |             |                                                                                 |                                                                                                     |                                                                                                     |                                                                                                                                                                                        |
|--------------|-------------|---------------------------------------------------------------------------------|-----------------------------------------------------------------------------------------------------|-----------------------------------------------------------------------------------------------------|----------------------------------------------------------------------------------------------------------------------------------------------------------------------------------------|
| <b>chr12</b> | SIN_1022200 | LOW QUALITY<br>PROTEIN:<br>dihydroflavonol 4-<br>reductase [Sesamum<br>indicum] | DFRA_ANTMA<br>Dihydroflavonol-4-<br>reductase<br>OS=Antirrhinum majus<br>GN=DFRA PE=2 SV=1          | O04113_PERFR<br>Dihydroflavonol 4-reductase<br>OS=Perilla frutescens PE=2<br>SV=1                   | IPR001509; NAD-dependent<br>epimerase/dehydratase                                                                                                                                      |
| <b>chr9</b>  | SIN_1024143 | MLO-like protein 6<br>[Sesamum indicum]                                         | MLO6_ARATH MLO-<br>like protein 6<br>OS=Arabidopsis thaliana<br>GN=MLO6 PE=2 SV=2                   | B9HQB2_POPTR Predicted<br>protein OS=Populus<br>trichocarpa<br>GN=POPTRDRAFT_558261<br>PE=4 SV=1    | IPR004326; Mlo-related protein                                                                                                                                                         |
| <b>chr8</b>  | SIN_1026689 | WAT1-related protein<br>At3g28050-like<br>[Sesamum indicum]                     | 5NG4_PINTA Auxin-<br>induced protein 5NG4<br>OS=Pinus taeda PE=2<br>SV=1                            | B9HJR3_POPTR Predicted<br>protein OS=Populus<br>trichocarpa<br>GN=POPTRDRAFT_766289<br>PE=4 SV=1    | IPR000620; Drug/metabolite<br>transporter                                                                                                                                              |
| <b>chr13</b> | SIN_1006470 | NA                                                                              | GSTF7_ARATH<br>Glutathione S-transferase<br>OS=Arabidopsis thaliana<br>GN=At3g03190 PE=2<br>SV=1    | B1B5E6_PERFR Glutathione<br>S-transferase OS=Perilla<br>frutescens var. crispa<br>GN=gst1 PE=2 SV=1 | IPR004045; Glutathione S-<br>transferase, N-terminal IPR004046;<br>Glutathione S-transferase, C-<br>terminal IPR017933; Glutathione S-<br>transferase/chloride channel, C-<br>terminal |
| <b>chr6</b>  | SIN_1012414 | NA                                                                              | KSA_PEA Ent-copalyl<br>diphosphate synthase,<br>chloroplastic OS=Pisum<br>sativum PE=2 SV=1         | Q59JI6_SCODU Putative<br>copalyl diphosphate<br>synthase OS=Scoparia dulcis<br>GN=cps PE=2 SV=1     | IPR001906; Terpene synthase-like<br>IPR005630; Terpene synthase, metal-<br>binding domain                                                                                              |
| <b>chr2</b>  | SIN_1017088 | NA                                                                              | FLS_PETHY Flavonol<br>synthase/flavanone 3-<br>hydroxylase OS=Petunia<br>hybrida GN=FL PE=2<br>SV=1 | Q2XP01_ANTMA Flavonol<br>synthase OS=Antirrhinum<br>majus PE=2 SV=1                                 | IPR005123; Oxoglutarate/iron-<br>dependent oxygenase                                                                                                                                   |

|             |             |    |                                                                                        |                                                                               |                                                                                                                              |
|-------------|-------------|----|----------------------------------------------------------------------------------------|-------------------------------------------------------------------------------|------------------------------------------------------------------------------------------------------------------------------|
| <b>chr3</b> | SIN_1017435 | NA | F3PH_PETHY Flavonoid<br>3'-monooxygenase<br>OS=Petunia hybrida<br>GN=CYP75B2 PE=2 SV=1 | Q2XP00_ANTMA<br>Flavonoid-3'-hydroxylase<br>OS=Antirrhinum majus PE=2<br>SV=1 | IPR001128; Cytochrome P450<br>IPR002401; Cytochrome P450, E-<br>class, group I IPR017972;<br>Cytochrome P450, conserved site |
| <b>chr9</b> | SIN_1025570 | NA | NA                                                                                     | NA                                                                            | NA                                                                                                                           |
