# Supplementary material for: Transcriptome Dynamics during Black and White Sesame (Sesamum indicum L.) Seed Development and Identification of Candidate Genes Associated with Black Pigmentation
Source: MDPI journal article supplement (doi:10.3390/genes11121399), 2020-11-25
Supplement: s1 [file s1]

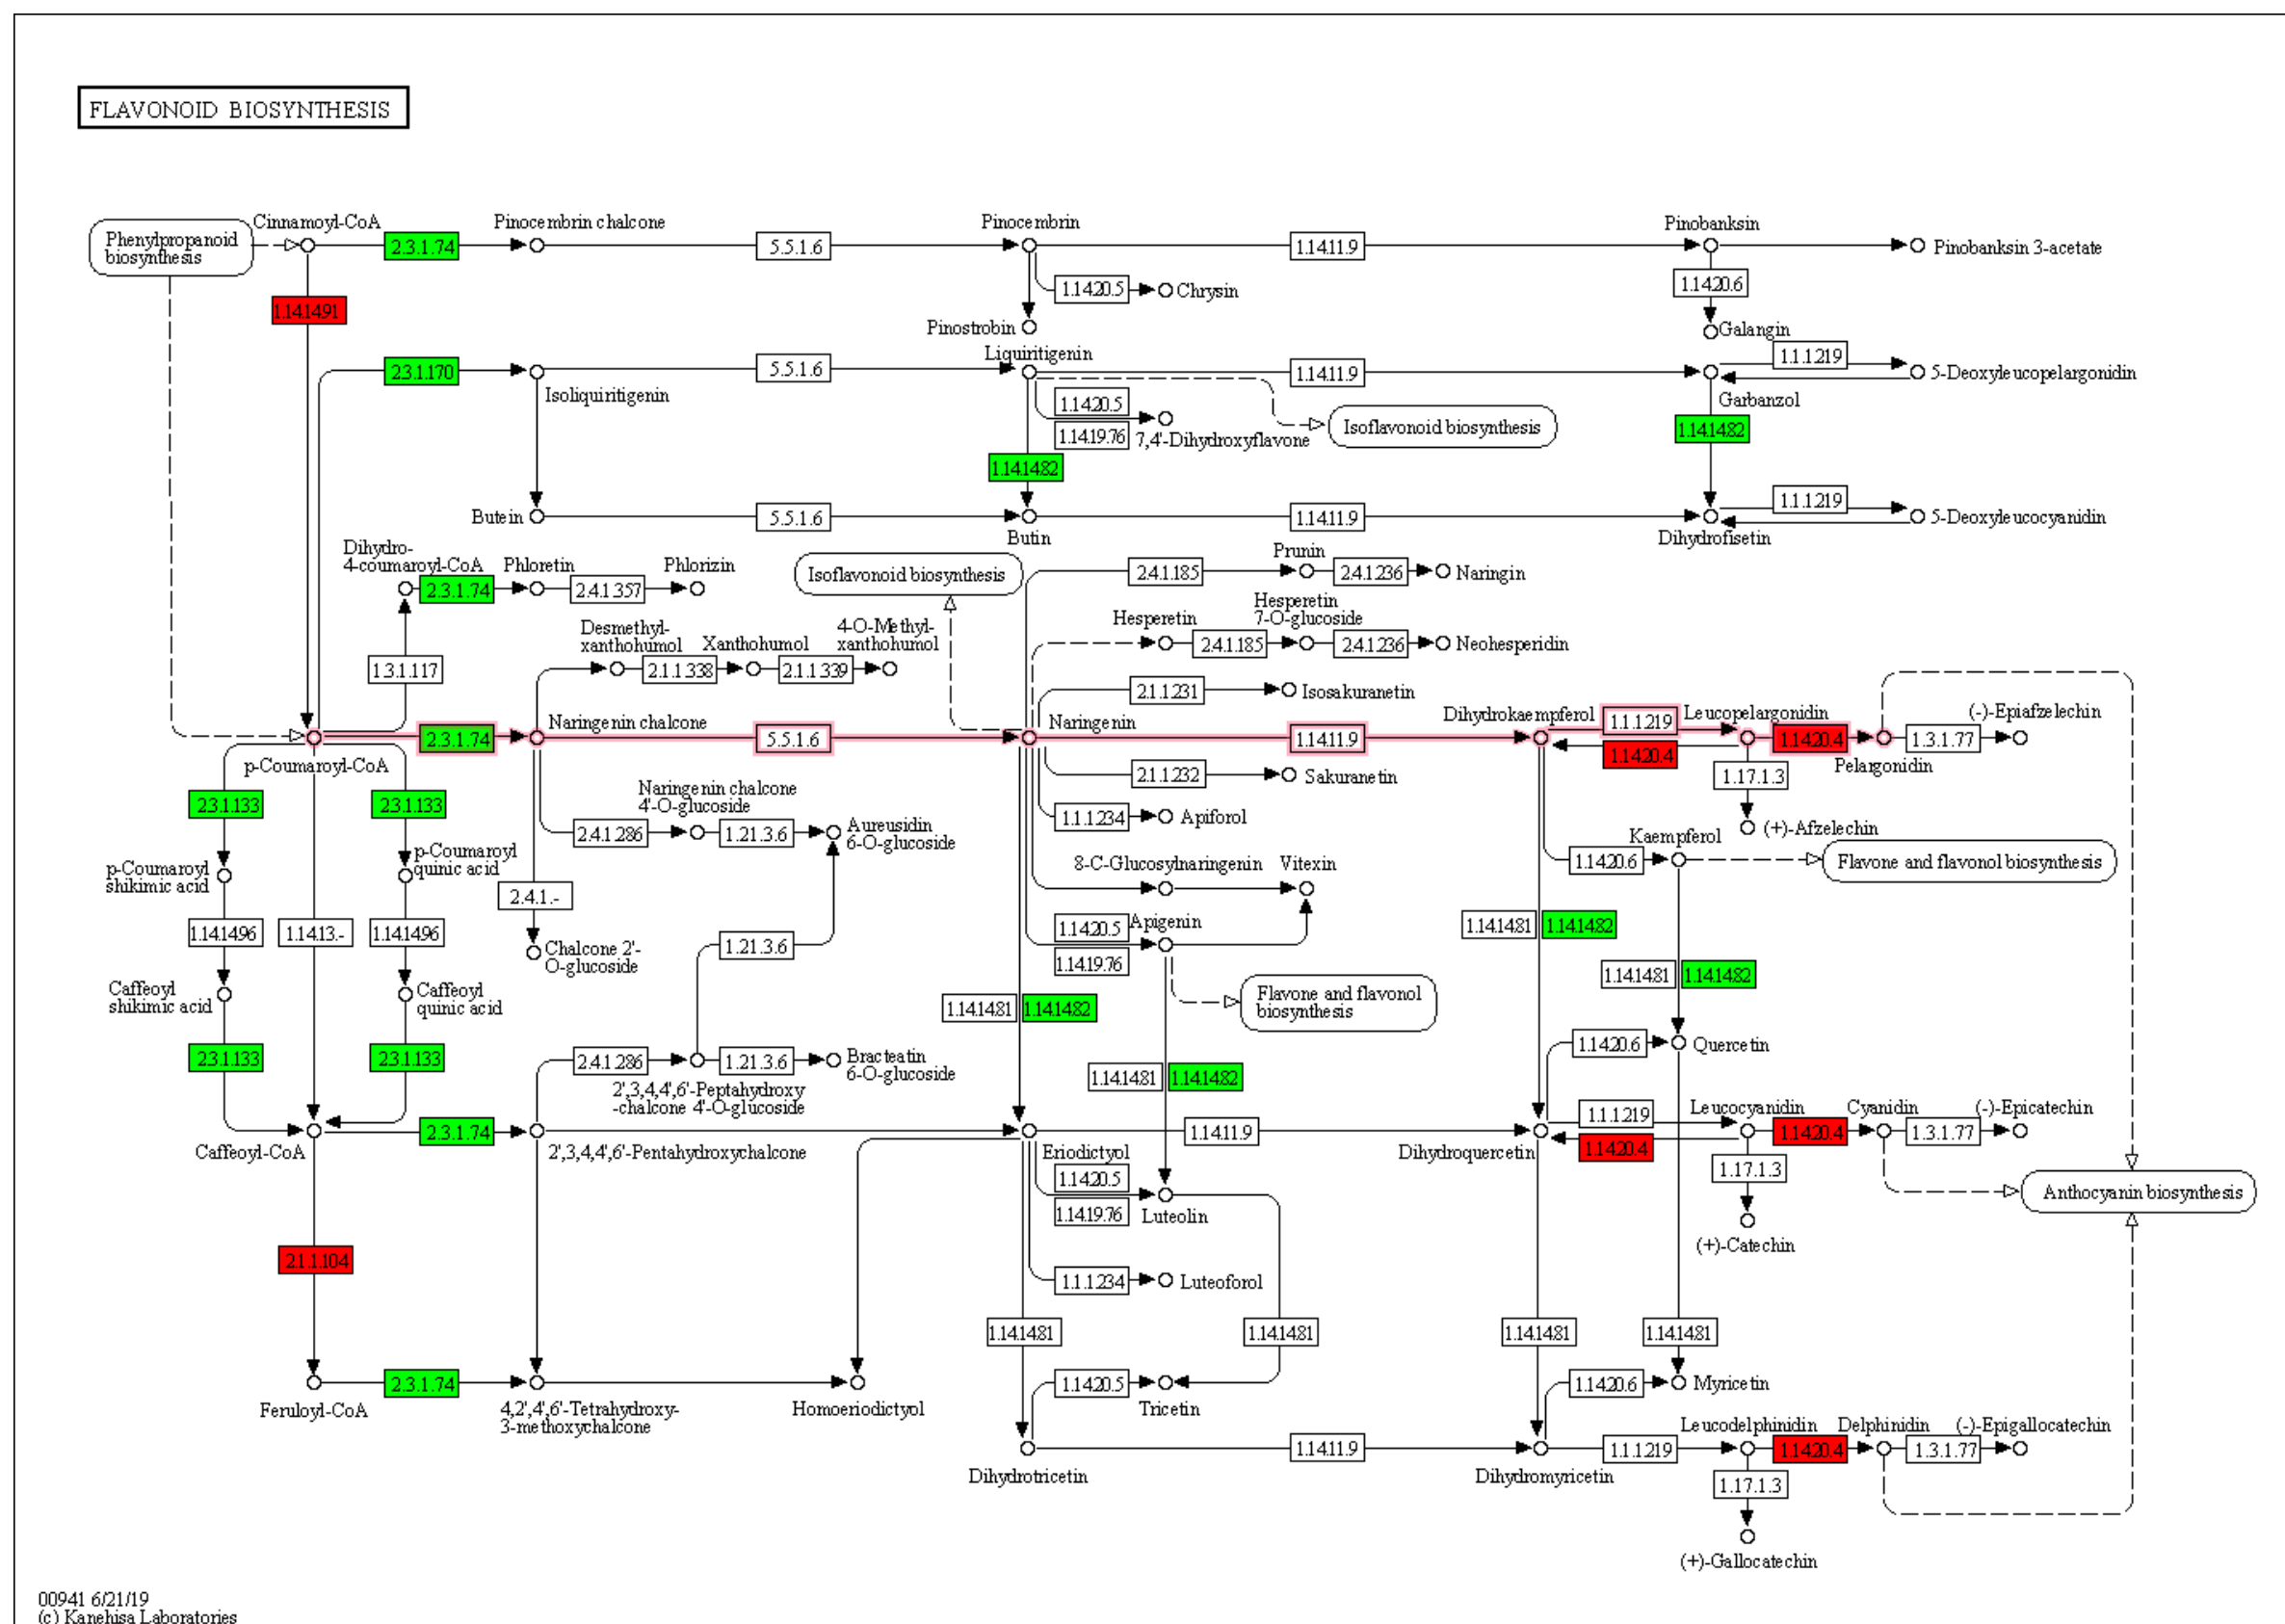

Red bar: up-regulated genes in black sesame  
Green bar: down-regulated genes in black sesame

**Figure S6.** The map of the DEGs between black and white sesame into the flavonoid pathway at 8 DPA.

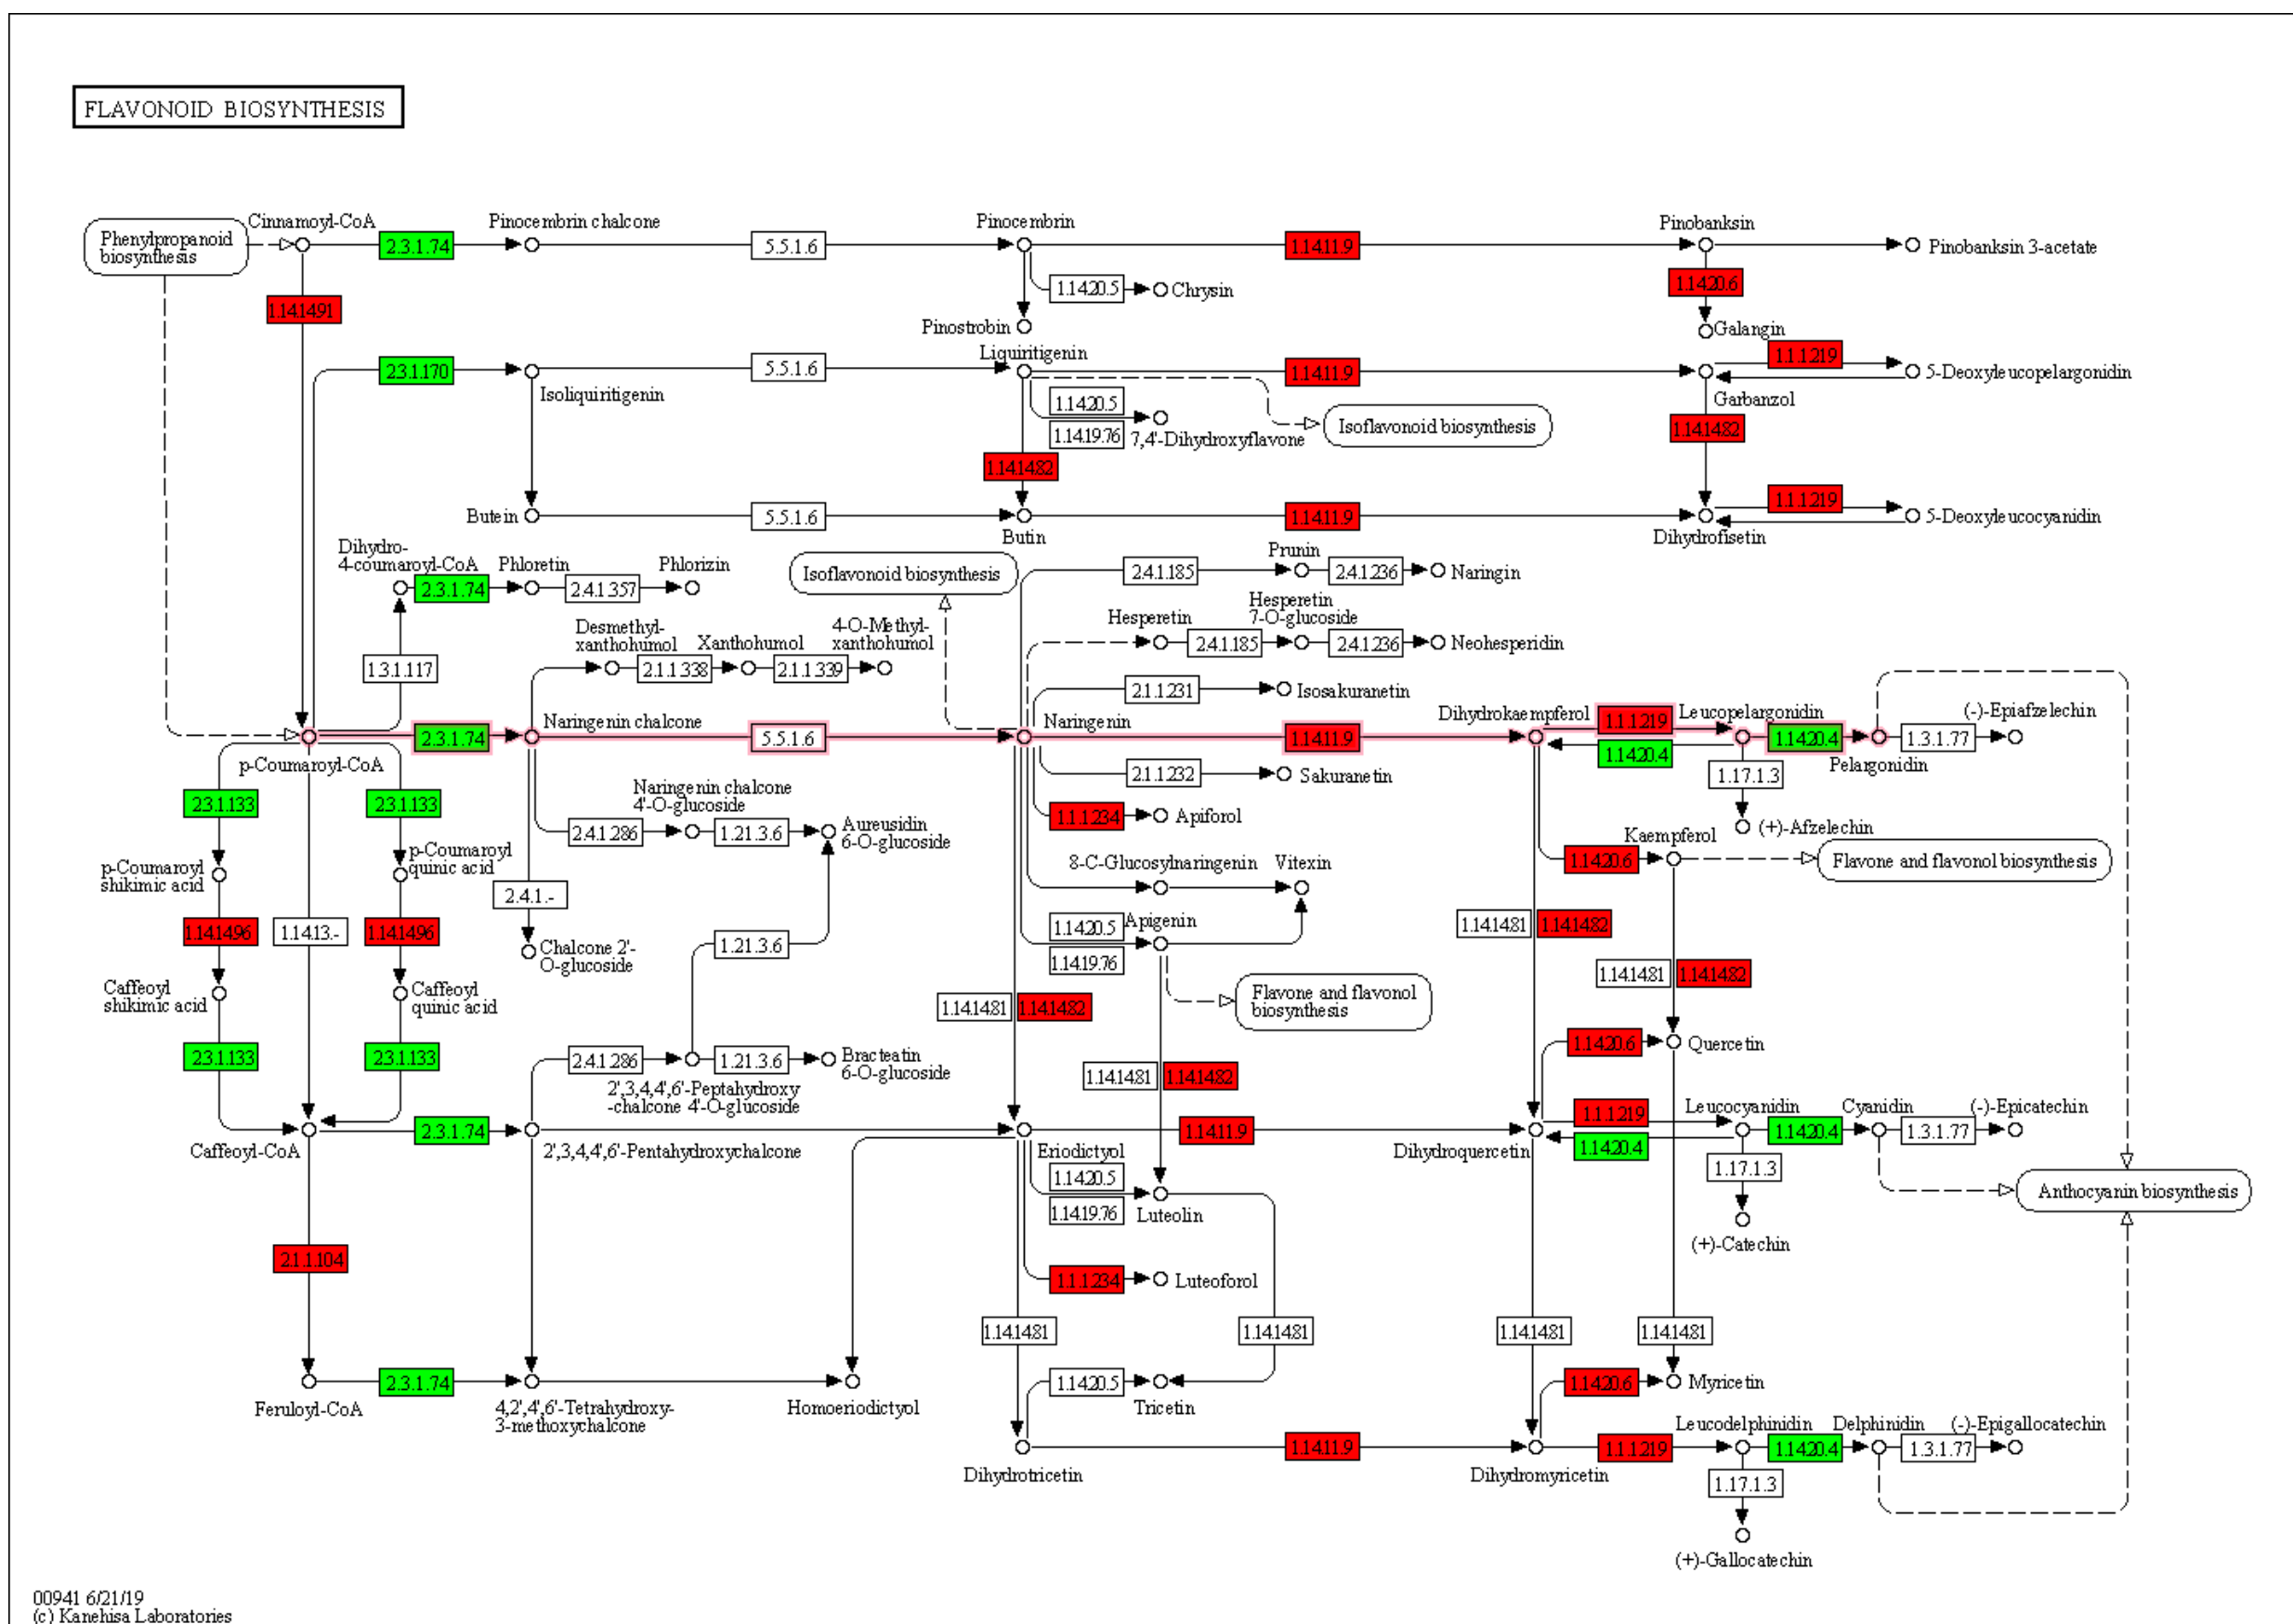

Red bar: up-regulated genes in black sesame  
Green bar: down-regulated genes in black sesame

**Figure S7.** The map of the DEGs between black and white sesame into the flavonoid pathway at 11 DPA.

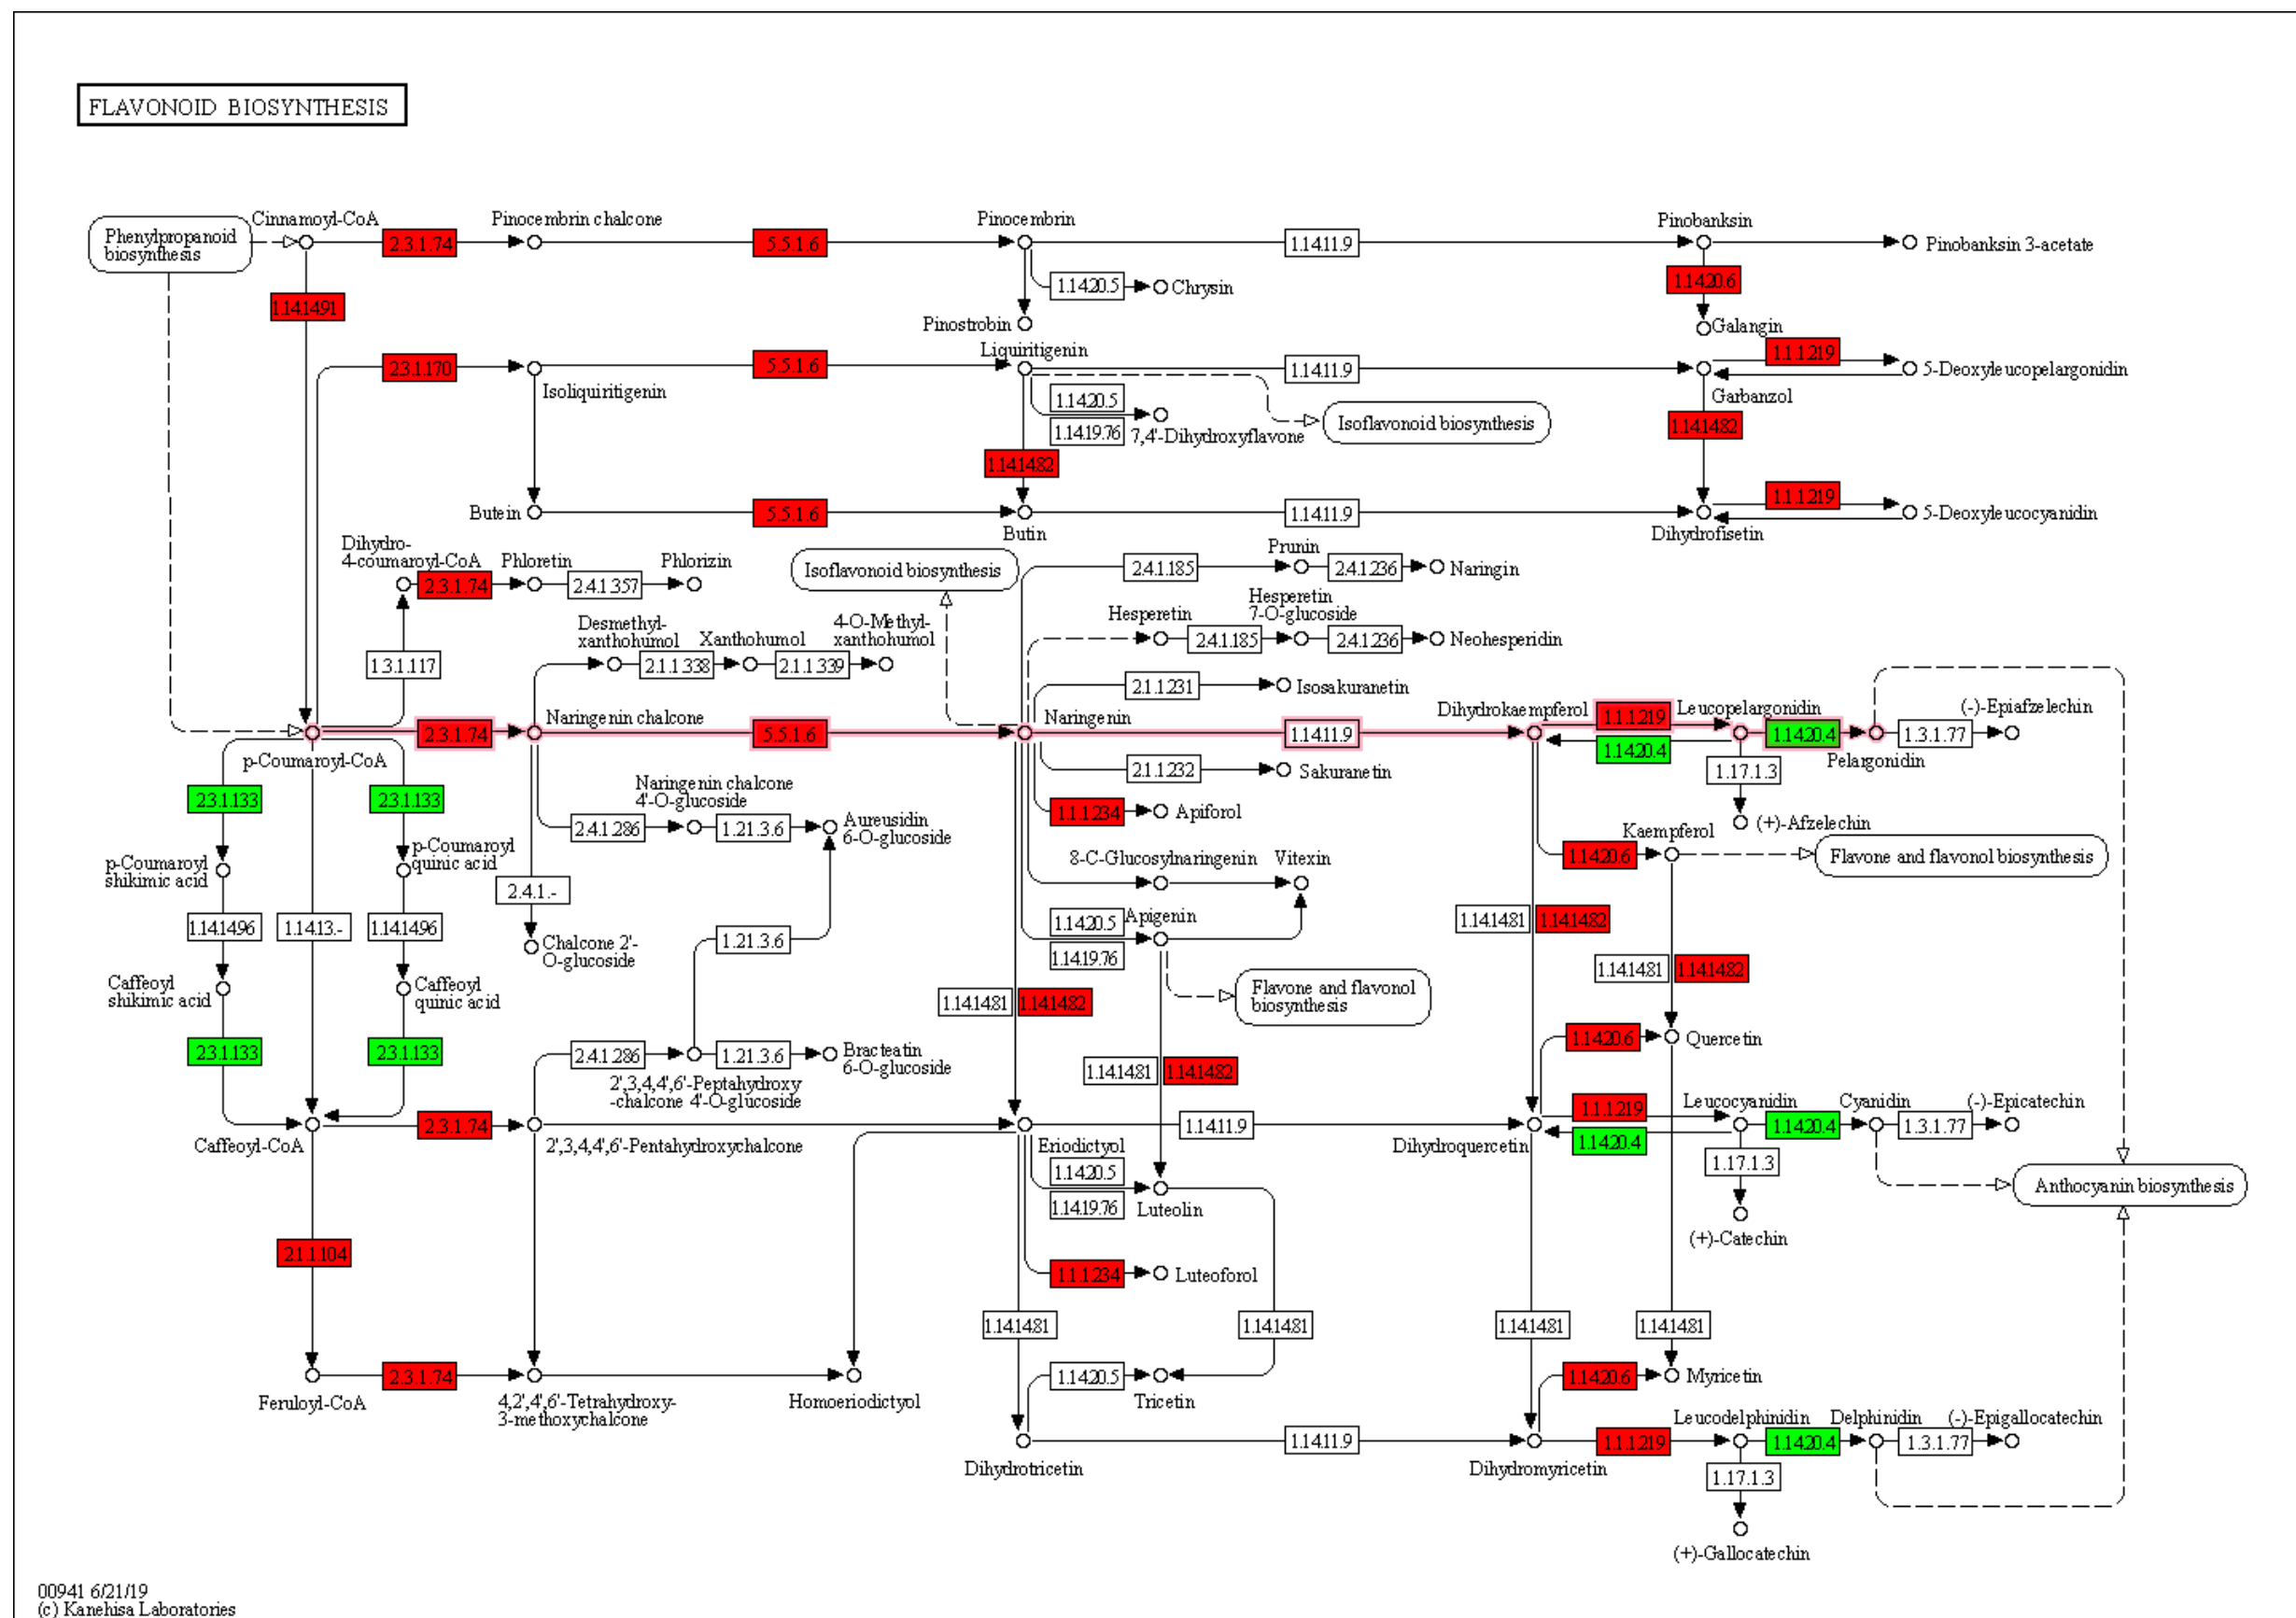

Red bar: up-regulated genes in black sesame  
Green bar: down-regulated genes in black sesame

**Figure S8.** The map of the DEGs between black and white sesame into the flavonoid pathway at 14 DPA.



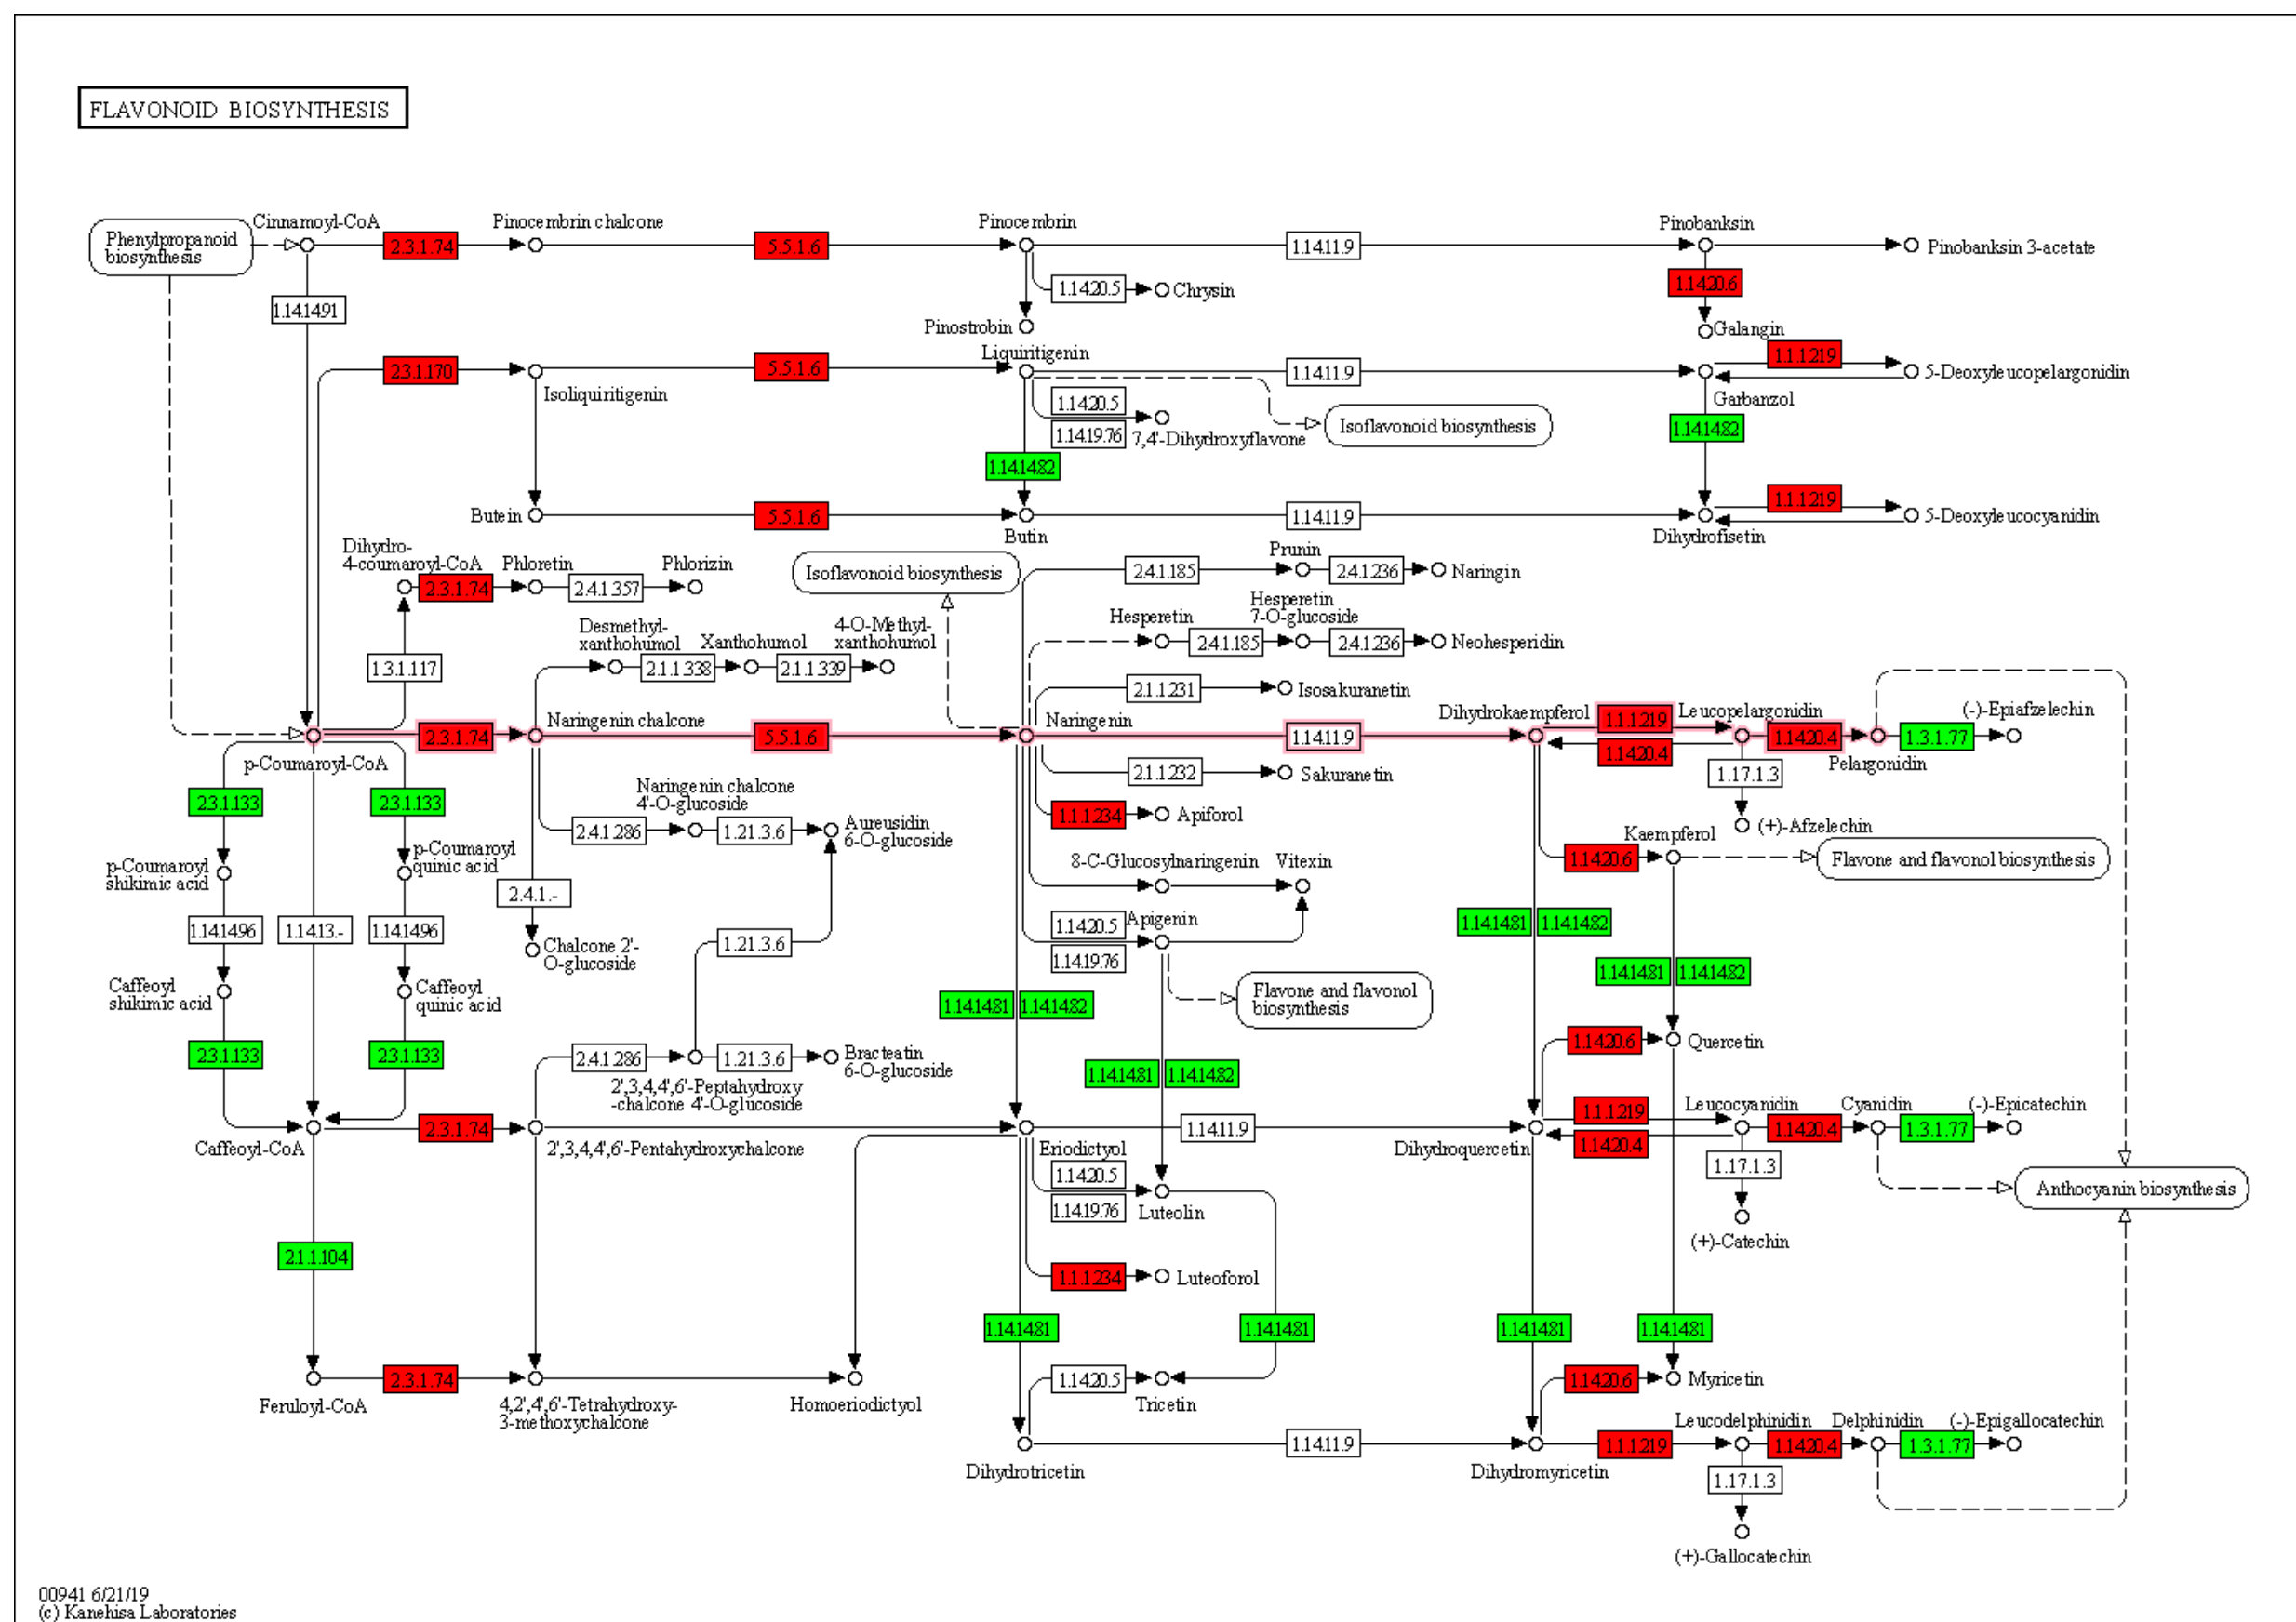

Red bar: up-regulated genes in black sesame  
Green bar: down-regulated genes in black sesame

**Figure S10.** The map of the DEGs between black and white sesame into the flavonoid pathway at 20 DPA.

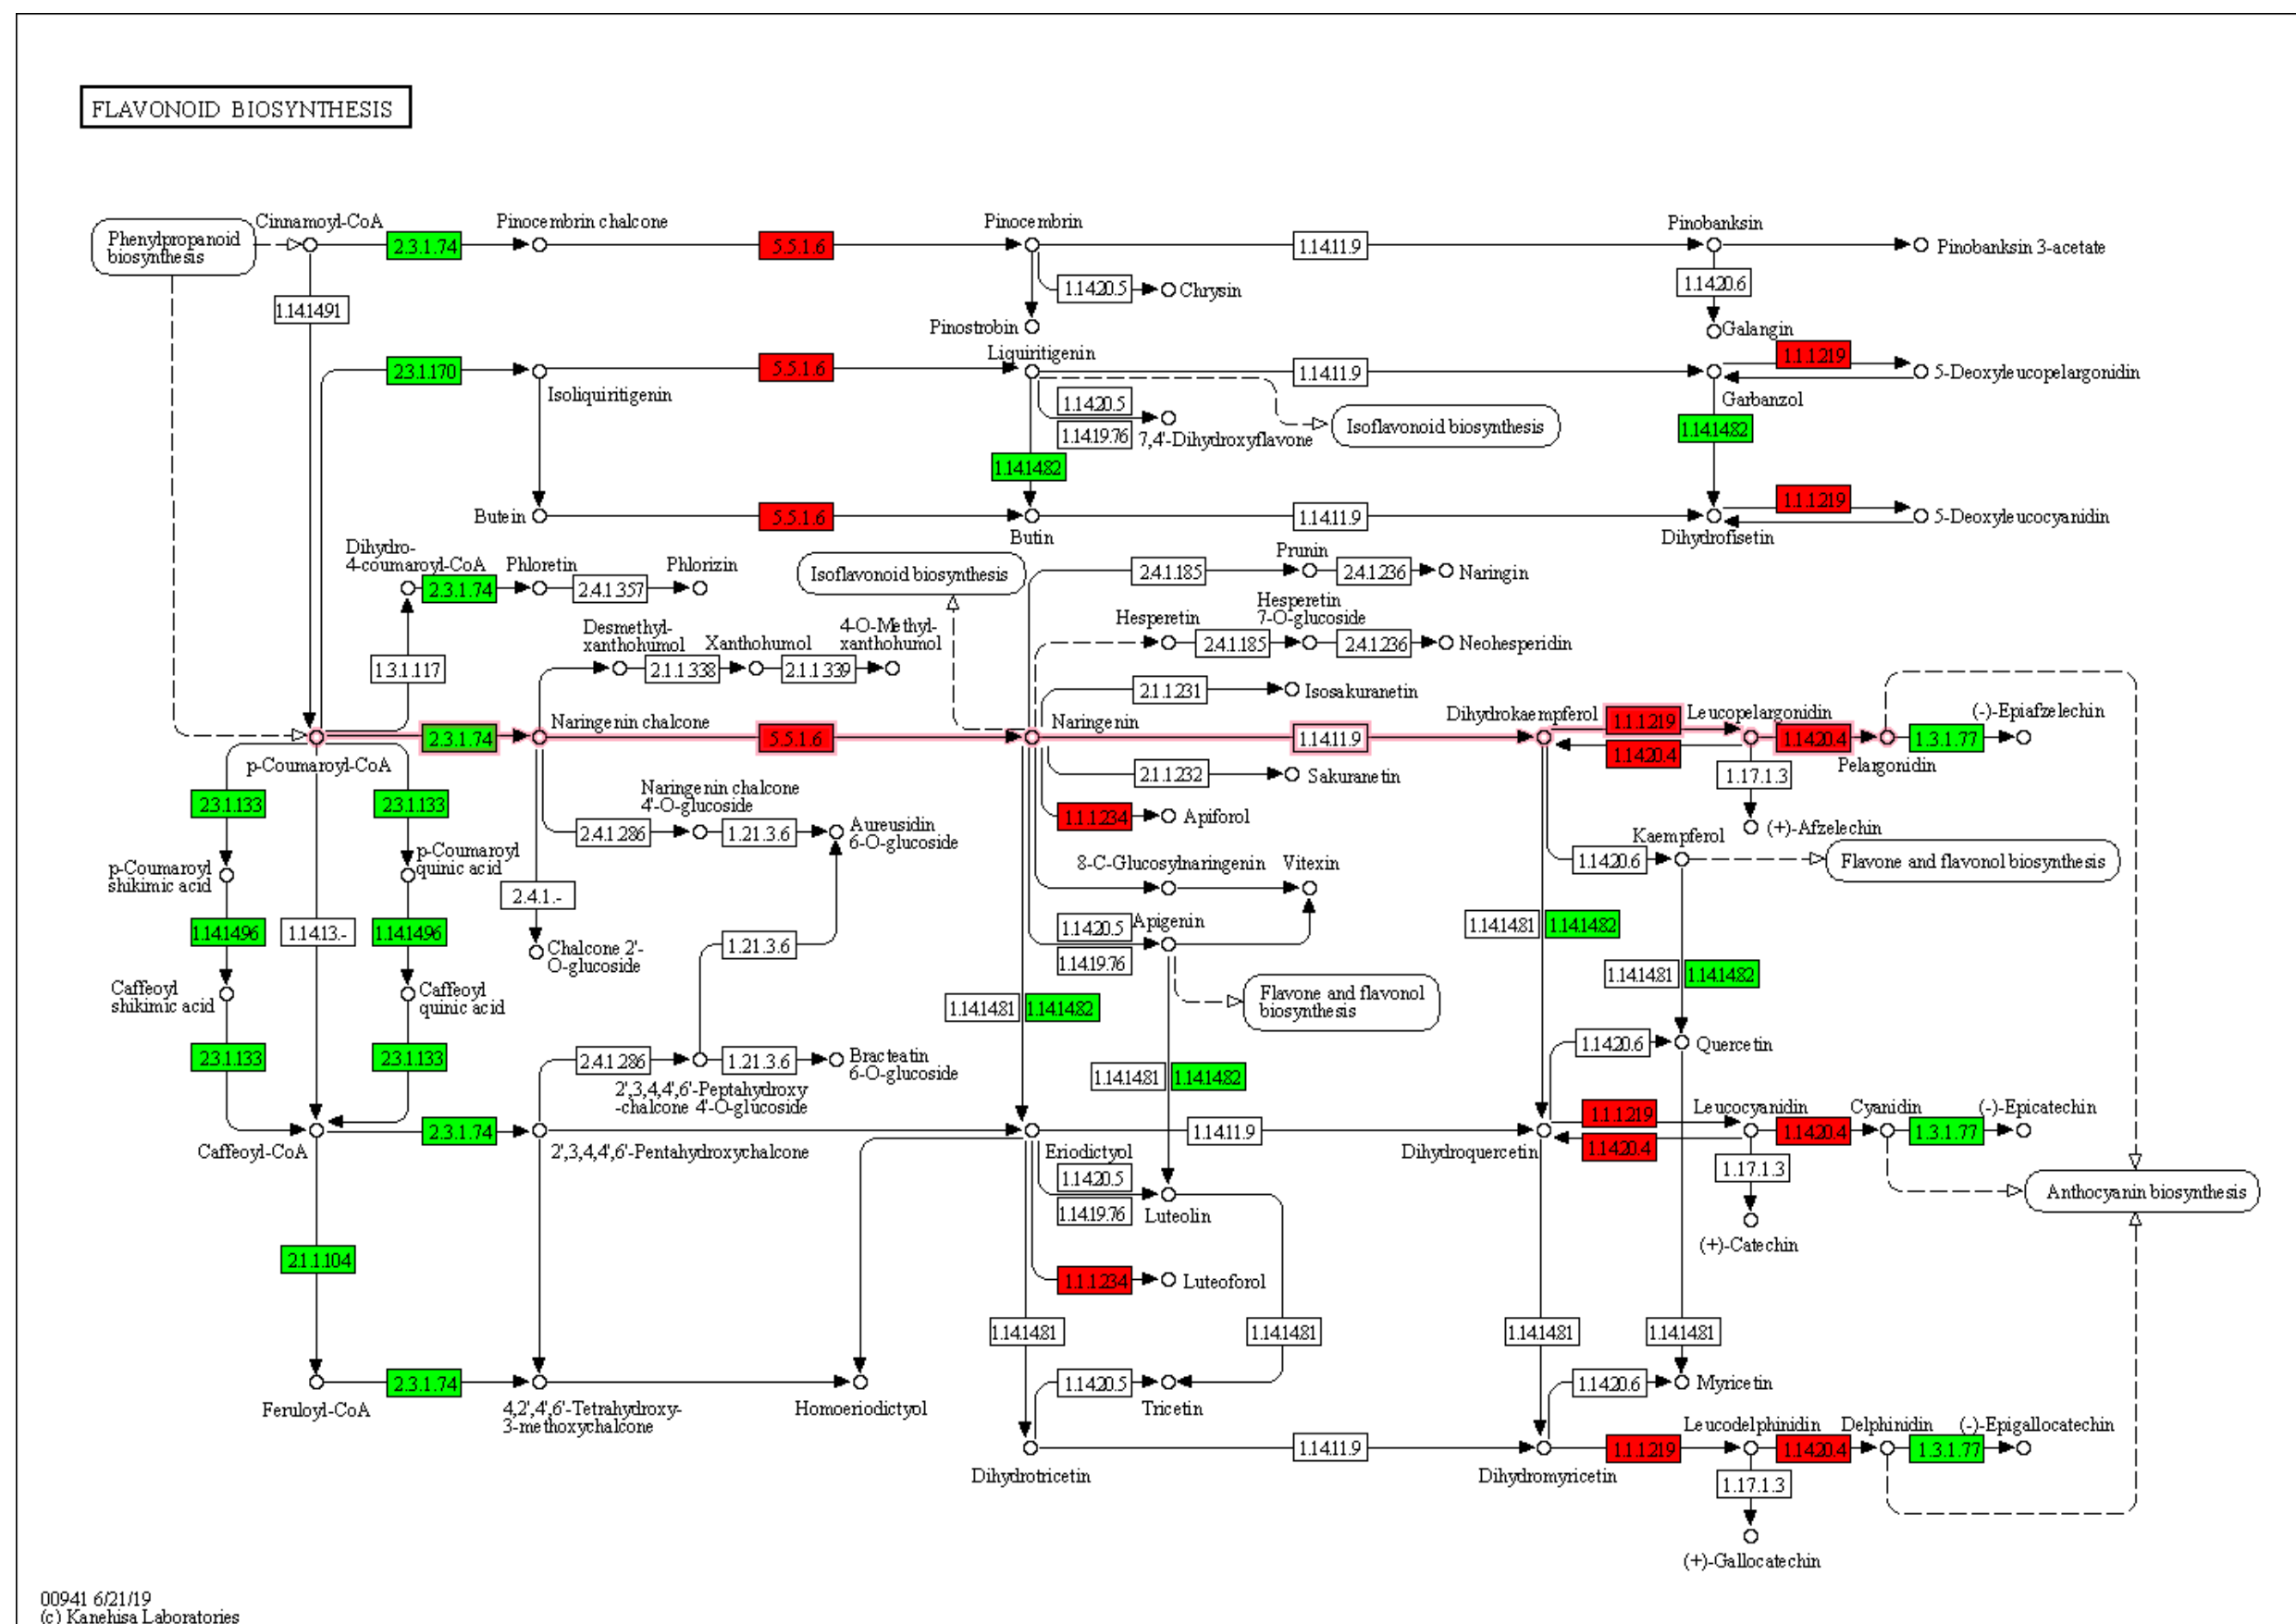

Red bar: up-regulated genes in black sesame  
Green bar: down-regulated genes in black sesame

**Figure S11.** The map of the DEGs between black and white sesame into the flavonoid pathway at 23 DPA.
