# Supplementary material for: Transcriptome Dynamics during Black and White Sesame (Sesamum indicum L.) Seed Development and Identification of Candidate Genes Associated with Black Pigmentation
Source: MDPI journal article supplement (doi:10.3390/genes11121399), 2020-11-25
Supplement: s1 [file s1]

Additional file 2

**Table S1:** Enriched GO terms of DEGs between the black and the white sesame

| GO                | GO Title                                           | Category | 5DPA | 8DPA | 11DPA | 14DPA | 17DPA | 20DPA | 23DPA | 26DPA | 30DPA | Total |
|-------------------|----------------------------------------------------|----------|------|------|-------|-------|-------|-------|-------|-------|-------|-------|
| <b>GO:0016491</b> | oxidoreductase activity                            | MF       | Y*   | Y    | Y     | Y     | Y     | Y     |       | Y     | Y     | 8     |
| <b>GO:0055114</b> | oxidation-reduction process                        | BP       | Y    | Y    | Y     | Y     | Y     | Y     |       | Y     |       | 7     |
| <b>GO:0003824</b> | catalytic activity                                 | MF       |      | Y    | Y     | Y     | Y     | Y     | Y     |       |       | 6     |
| <b>GO:0005506</b> | iron ion binding                                   | MF       |      | Y    | Y     | Y     | Y     | Y     |       | Y     |       | 6     |
| <b>GO:0004497</b> | monooxygenase activity                             | MF       |      | Y    | Y     | Y     | Y     |       |       | Y     |       | 5     |
| <b>GO:0009055</b> | electron carrier activity                          | MF       |      | Y    | Y     | Y     | Y     |       |       | Y     |       | 5     |
| <b>GO:0020037</b> | heme binding                                       | MF       |      | Y    | Y     | Y     | Y     |       |       | Y     |       | 5     |
| <b>GO:0008152</b> | metabolic process                                  | BP       |      |      | Y     | Y     |       | Y     |       |       | Y     | 4     |
| <b>GO:0009607</b> | response to biotic stimulus                        | BP       |      |      | Y     | Y     |       |       |       | Y     |       | 3     |
| <b>GO:0004097</b> | catechol oxidase activity                          | MF       |      |      | Y     | Y     |       |       |       |       |       | 2     |
| <b>GO:0005507</b> | copper ion binding                                 | MF       |      | Y    |       | Y     |       |       |       |       |       | 2     |
| <b>GO:0005618</b> | cell wall                                          | CC       |      |      | Y     | Y     |       |       |       |       |       | 2     |
| <b>GO:0006629</b> | lipid metabolic process                            | BP       |      |      | Y     | Y     |       |       |       |       |       | 2     |
| <b>GO:0008171</b> | O-methyltransferase activity                       | MF       |      | Y    |       | Y     |       |       |       |       |       | 2     |
| <b>GO:0016757</b> | transferase activity, transferring glycosyl groups | MF       |      | Y    | Y     |       |       |       |       |       |       | 2     |
| <b>GO:0016758</b> | transferase activity, transferring hexosyl groups  | MF       |      | Y    | Y     |       |       |       |       |       |       | 2     |
| <b>GO:0016998</b> | cell wall macromolecule catabolic process          | BP       |      |      | Y     | Y     |       |       |       |       |       | 2     |
| <b>GO:0048544</b> | recognition of pollen                              | BP       |      |      | Y     | Y     |       |       |       |       |       | 2     |
| <b>GO:0050662</b> | coenzyme binding                                   | MF       |      | Y    |       | Y     |       |       |       |       |       | 2     |
| <b>GO:0071554</b> | cell wall organization or biogenesis               | BP       |      |      | Y     | Y     |       |       |       |       |       | 2     |
| <b>GO:0000003</b> | reproduction                                       | BP       |      |      | Y     |       |       |       |       |       |       | 1     |

|                   |                                                      |    |   |   |   |
|-------------------|------------------------------------------------------|----|---|---|---|
| <b>GO:0003723</b> | RNA binding                                          | MF |   | Y | 1 |
| <b>GO:0003735</b> | structural constituent of ribosome                   | MF |   | Y | 1 |
| <b>GO:0004553</b> | hydrolase activity, hydrolyzing O-glycosyl compounds | MF | Y |   | 1 |
| <b>GO:0004672</b> | protein kinase activity                              | MF |   | Y | 1 |
| <b>GO:0004674</b> | protein serine/threonine kinase activity             | MF |   | Y | 1 |
| <b>GO:0004842</b> | ubiquitin-protein ligase activity                    | MF |   | Y | 1 |
| <b>GO:0005198</b> | structural molecule activity                         | MF |   | Y | 1 |
| <b>GO:0005215</b> | transporter activity                                 | MF |   | Y | 1 |
| <b>GO:0005529</b> | sugar binding                                        | MF | Y |   | 1 |
| <b>GO:0005576</b> | extracellular region                                 | CC | Y |   | 1 |
| <b>GO:0005622</b> | intracellular                                        | CC |   | Y | 1 |
| <b>GO:0005737</b> | cytoplasm                                            | CC |   | Y | 1 |
| <b>GO:0005840</b> | ribosome                                             | CC |   | Y | 1 |
| <b>GO:0005975</b> | carbohydrate metabolic process                       | BP | Y |   | 1 |
| <b>GO:0005976</b> | polysaccharide metabolic process                     | BP |   | Y | 1 |
| <b>GO:0006221</b> | pyrimidine nucleotide biosynthetic process           | BP |   | Y | 1 |
| <b>GO:0006412</b> | translation                                          | BP |   | Y | 1 |
| <b>GO:0006468</b> | protein phosphorylation                              | BP |   | Y | 1 |
| <b>GO:0006631</b> | fatty acid metabolic process                         | BP |   | Y | 1 |
| <b>GO:0006855</b> | drug transmembrane transport                         | BP |   | Y | 1 |
| <b>GO:0006857</b> | oligopeptide transport                               | BP |   | Y | 1 |
| <b>GO:0006869</b> | lipid transport                                      | BP | Y |   | 1 |
| <b>GO:0008061</b> | chitin binding                                       | MF |   | Y | 1 |
| <b>GO:0008194</b> | UDP-glycosyltransferase activity                     | MF |   | Y | 1 |
| <b>GO:0008289</b> | lipid binding                                        | MF | Y |   | 1 |
| <b>GO:0009058</b> | biosynthetic process                                 | BP |   | Y | 1 |
| <b>GO:0009059</b> | macromolecule biosynthetic process                   | BP |   | Y | 1 |

|                   |                                                                                                 |    |   |   |
|-------------------|-------------------------------------------------------------------------------------------------|----|---|---|
| <b>GO:0009415</b> | response to water                                                                               | BP | Y | 1 |
| <b>GO:0009521</b> | photosystem                                                                                     | CC | Y | 1 |
| <b>GO:0009523</b> | photosystem II                                                                                  | CC | Y | 1 |
| <b>GO:0009538</b> | photosystem I reaction center                                                                   | CC | Y | 1 |
| <b>GO:0009690</b> | cytokinin metabolic process                                                                     | BP | Y | 1 |
| <b>GO:0010467</b> | gene expression                                                                                 | BP | Y | 1 |
| <b>GO:0012511</b> | monolayer-surrounded lipid storage body                                                         | CC | Y | 1 |
| <b>GO:0016301</b> | kinase activity                                                                                 | MF | Y | 1 |
| <b>GO:0016310</b> | phosphorylation                                                                                 | BP | Y | 1 |
| <b>GO:0016567</b> | protein ubiquitination                                                                          | BP | Y | 1 |
| <b>GO:0016620</b> | oxidoreductase activity, acting on the aldehyde or oxo group of donors, NAD or NADP as acceptor | MF | Y | 1 |
| <b>GO:0016740</b> | transferase activity                                                                            | MF | Y | 1 |
| <b>GO:0016773</b> | phosphotransferase activity, alcohol group as acceptor                                          | MF | Y | 1 |
| <b>GO:0016798</b> | hydrolase activity, acting on glycosyl bonds                                                    | MF | Y | 1 |
| <b>GO:0016841</b> | ammonia-lyase activity                                                                          | MF | Y | 1 |
| <b>GO:0016903</b> | oxidoreductase activity, acting on the aldehyde or oxo group of donors                          | MF | Y | 1 |
| <b>GO:0019139</b> | cytokinin dehydrogenase activity                                                                | MF | Y | 1 |
| <b>GO:0030246</b> | carbohydrate binding                                                                            | MF | Y | 1 |
| <b>GO:0030312</b> | external encapsulating structure                                                                | CC | Y | 1 |
| <b>GO:0030529</b> | ribonucleoprotein complex                                                                       | CC | Y | 1 |
| <b>GO:0032501</b> | multicellular organismal process                                                                | BP | Y | 1 |
| <b>GO:0032991</b> | macromolecular complex                                                                          | CC | Y | 1 |
| <b>GO:0033897</b> | ribonuclease T2 activity                                                                        | MF | Y | 1 |

|                   |                                                     |    |   |   |   |
|-------------------|-----------------------------------------------------|----|---|---|---|
| <b>GO:0034645</b> | cellular macromolecule biosynthetic process         | BP |   | Y | 1 |
| <b>GO:0042026</b> | protein refolding                                   | BP |   | Y | 1 |
| <b>GO:0043169</b> | cation binding                                      | MF | Y |   | 1 |
| <b>GO:0043229</b> | intracellular organelle                             | CC |   | Y | 1 |
| <b>GO:0043232</b> | intracellular non-membrane-bounded organelle        | CC |   | Y | 1 |
| <b>GO:0044036</b> | cell wall macromolecule metabolic process           | BP | Y |   | 1 |
| <b>GO:0044237</b> | cellular metabolic process                          | BP |   | Y | 1 |
| <b>GO:0044238</b> | primary metabolic process                           | BP |   | Y | 1 |
| <b>GO:0044249</b> | cellular biosynthetic process                       | BP |   | Y | 1 |
| <b>GO:0044267</b> | cellular protein metabolic process                  | BP |   | Y | 1 |
| <b>GO:0044424</b> | intracellular part                                  | CC |   | Y | 1 |
| <b>GO:0044444</b> | cytoplasmic part                                    | CC |   | Y | 1 |
| <b>GO:0045735</b> | nutrient reservoir activity                         | MF | Y |   | 1 |
| <b>GO:0046872</b> | metal ion binding                                   | MF |   | Y | 1 |
| <b>GO:0046906</b> | tetrapyrrole binding                                | MF |   | Y | 1 |
| <b>GO:0046914</b> | transition metal ion binding                        | MF |   | Y | 1 |
| <b>GO:0048037</b> | cofactor binding                                    | MF |   | Y | 1 |
| <b>GO:0050660</b> | flavin adenine dinucleotide binding                 | MF | Y |   | 1 |
| <b>GO:0052689</b> | carboxylic ester hydrolase activity                 | MF | Y |   | 1 |
| <b>GO:0071702</b> | organic substance transport                         | BP | Y |   | 1 |
| <b>GO:0072528</b> | pyrimidine-containing compound biosynthetic process | BP |   | Y | 1 |

Y\*: Yes

**Table S2:** Enriched KEGG pathways of DEGs between the black and the white sesame

| MapID    | MapTitle                                              | 5DPA | 8DPA | 11DPA | 14DPA | 17DPA | 20DPA | 23DPA | 26DPA | 30DPA | Total |
|----------|-------------------------------------------------------|------|------|-------|-------|-------|-------|-------|-------|-------|-------|
| map00941 | Flavonoid biosynthesis                                |      | Y    | Y     | Y     | Y     | Y     | Y     | Y     |       | 7     |
| map01110 | Biosynthesis of secondary metabolites                 | Y    | Y    | Y     | Y     | Y     | Y     |       | Y     |       | 7     |
| map01100 | Metabolic pathways                                    | Y    | Y    | Y     | Y     | Y     |       |       | Y     |       | 6     |
| map00363 | Bisphenol degradation                                 |      | Y    | Y     | Y     | Y     |       |       | Y     |       | 5     |
| map00624 | Polycyclic aromatic hydrocarbon degradation           |      | Y    | Y     | Y     | Y     |       |       | Y     |       | 5     |
| map00627 | Aminobenzoate degradation                             |      | Y    | Y     | Y     | Y     |       |       | Y     |       | 5     |
| map00903 | Limonene and pinene degradation                       |      | Y    | Y     | Y     | Y     |       |       | Y     |       | 5     |
| map00944 | Flavone and flavonol biosynthesis                     |      | Y    | Y     | Y     | Y     |       |       | Y     |       | 5     |
| map00945 | Stilbenoid, diarylheptanoid and gingerol biosynthesis |      | Y    | Y     | Y     | Y     |       |       | Y     |       | 5     |
| map04976 | Bile secretion                                        |      |      | Y     | Y     |       |       | Y     | Y     |       | 4     |
| map00904 | Diterpenoid biosynthesis                              |      |      | Y     |       | Y     |       |       | Y     |       | 3     |
| map00906 | Carotenoid biosynthesis                               |      |      | Y     | Y     |       | Y     |       |       |       | 3     |
| map00940 | Phenylpropanoid biosynthesis                          |      |      | Y     | Y     | Y     |       |       |       |       | 3     |
| map01120 | Microbial metabolism in diverse environments          |      |      |       | Y     | Y     |       |       | Y     |       | 3     |
| map02010 | ABC transporters                                      |      |      |       | Y     |       |       | Y     | Y     |       | 3     |
| map00196 | Photosynthesis - antenna proteins                     | Y    |      |       |       |       |       | Y     |       |       | 2     |
| map00360 | Phenylalanine metabolism                              |      |      | Y     | Y     |       |       |       |       |       | 2     |
| map00592 | alpha-Linolenic acid metabolism                       | Y    |      | Y     |       |       |       |       |       |       | 2     |
| map00010 | Glycolysis / Gluconeogenesis                          | Y    |      |       |       |       |       |       |       |       | 1     |
| map00040 | Pentose and glucuronate interconversions              |      |      | Y     |       |       |       |       |       |       | 1     |
| map00053 | Ascorbate and aldarate metabolism                     |      |      |       | Y     |       |       |       |       |       | 1     |

|                 |                                         |   |   |
|-----------------|-----------------------------------------|---|---|
| <b>map00270</b> | Cysteine and methionine metabolism      | Y | 1 |
| <b>map00950</b> | Isoquinoline alkaloid biosynthesis      | Y | 1 |
| <b>map01040</b> | Biosynthesis of unsaturated fatty acids | Y | 1 |
| <b>map03010</b> | Ribosome                                | Y | 1 |
| <b>map04075</b> | Plant hormone signal transduction       | Y | 1 |
| <b>map04210</b> | Apoptosis                               | Y | 1 |
| <b>map04620</b> | Toll-like receptor signaling pathway    | Y | 1 |
| <b>map04626</b> | Plant-pathogen interaction              | Y | 1 |
| <b>map04722</b> | Neurotrophin signaling pathway          | Y | 1 |
| <b>map04740</b> | Olfactory transduction                  | Y | 1 |
| <b>map04916</b> | Melanogenesis                           | Y | 1 |
| <b>map04970</b> | Salivary secretion                      | Y | 1 |
| <b>map04971</b> | Gastric acid secretion                  | Y | 1 |
| <b>map04974</b> | Protein digestion and absorption        | Y | 1 |
| <b>map05140</b> | Leishmaniasis                           | Y | 1 |
| <b>map05145</b> | Toxoplasmosis                           | Y | 1 |

Y\*: Yes
