# Supplementary material for: Transcriptome Dynamics during Black and White Sesame (Sesamum indicum L.) Seed Development and Identification of Candidate Genes Associated with Black Pigmentation
Source: Genes (Basel). 2020 Nov 25;11(12):1399. doi: 10.3390/genes11121399 (PMC7768470; doi:10.3390/genes11121399)
Supplement: Supplementary file 1 [file genes-11-01399-s002.zip]

Archive with 4 entries (4 files):
- Additional file 1.pdf
- Additional file 2.pdf
- Additional file 3.pdf
- Additional file 4.pdf
